# Supplementary material for: Spatial immune composition of tumor microenvironment in patients with pancreatic cancer
Source: Springer Nature journal article supplement (doi:10.1007/s00262-023-03573-6), 2023-11-08

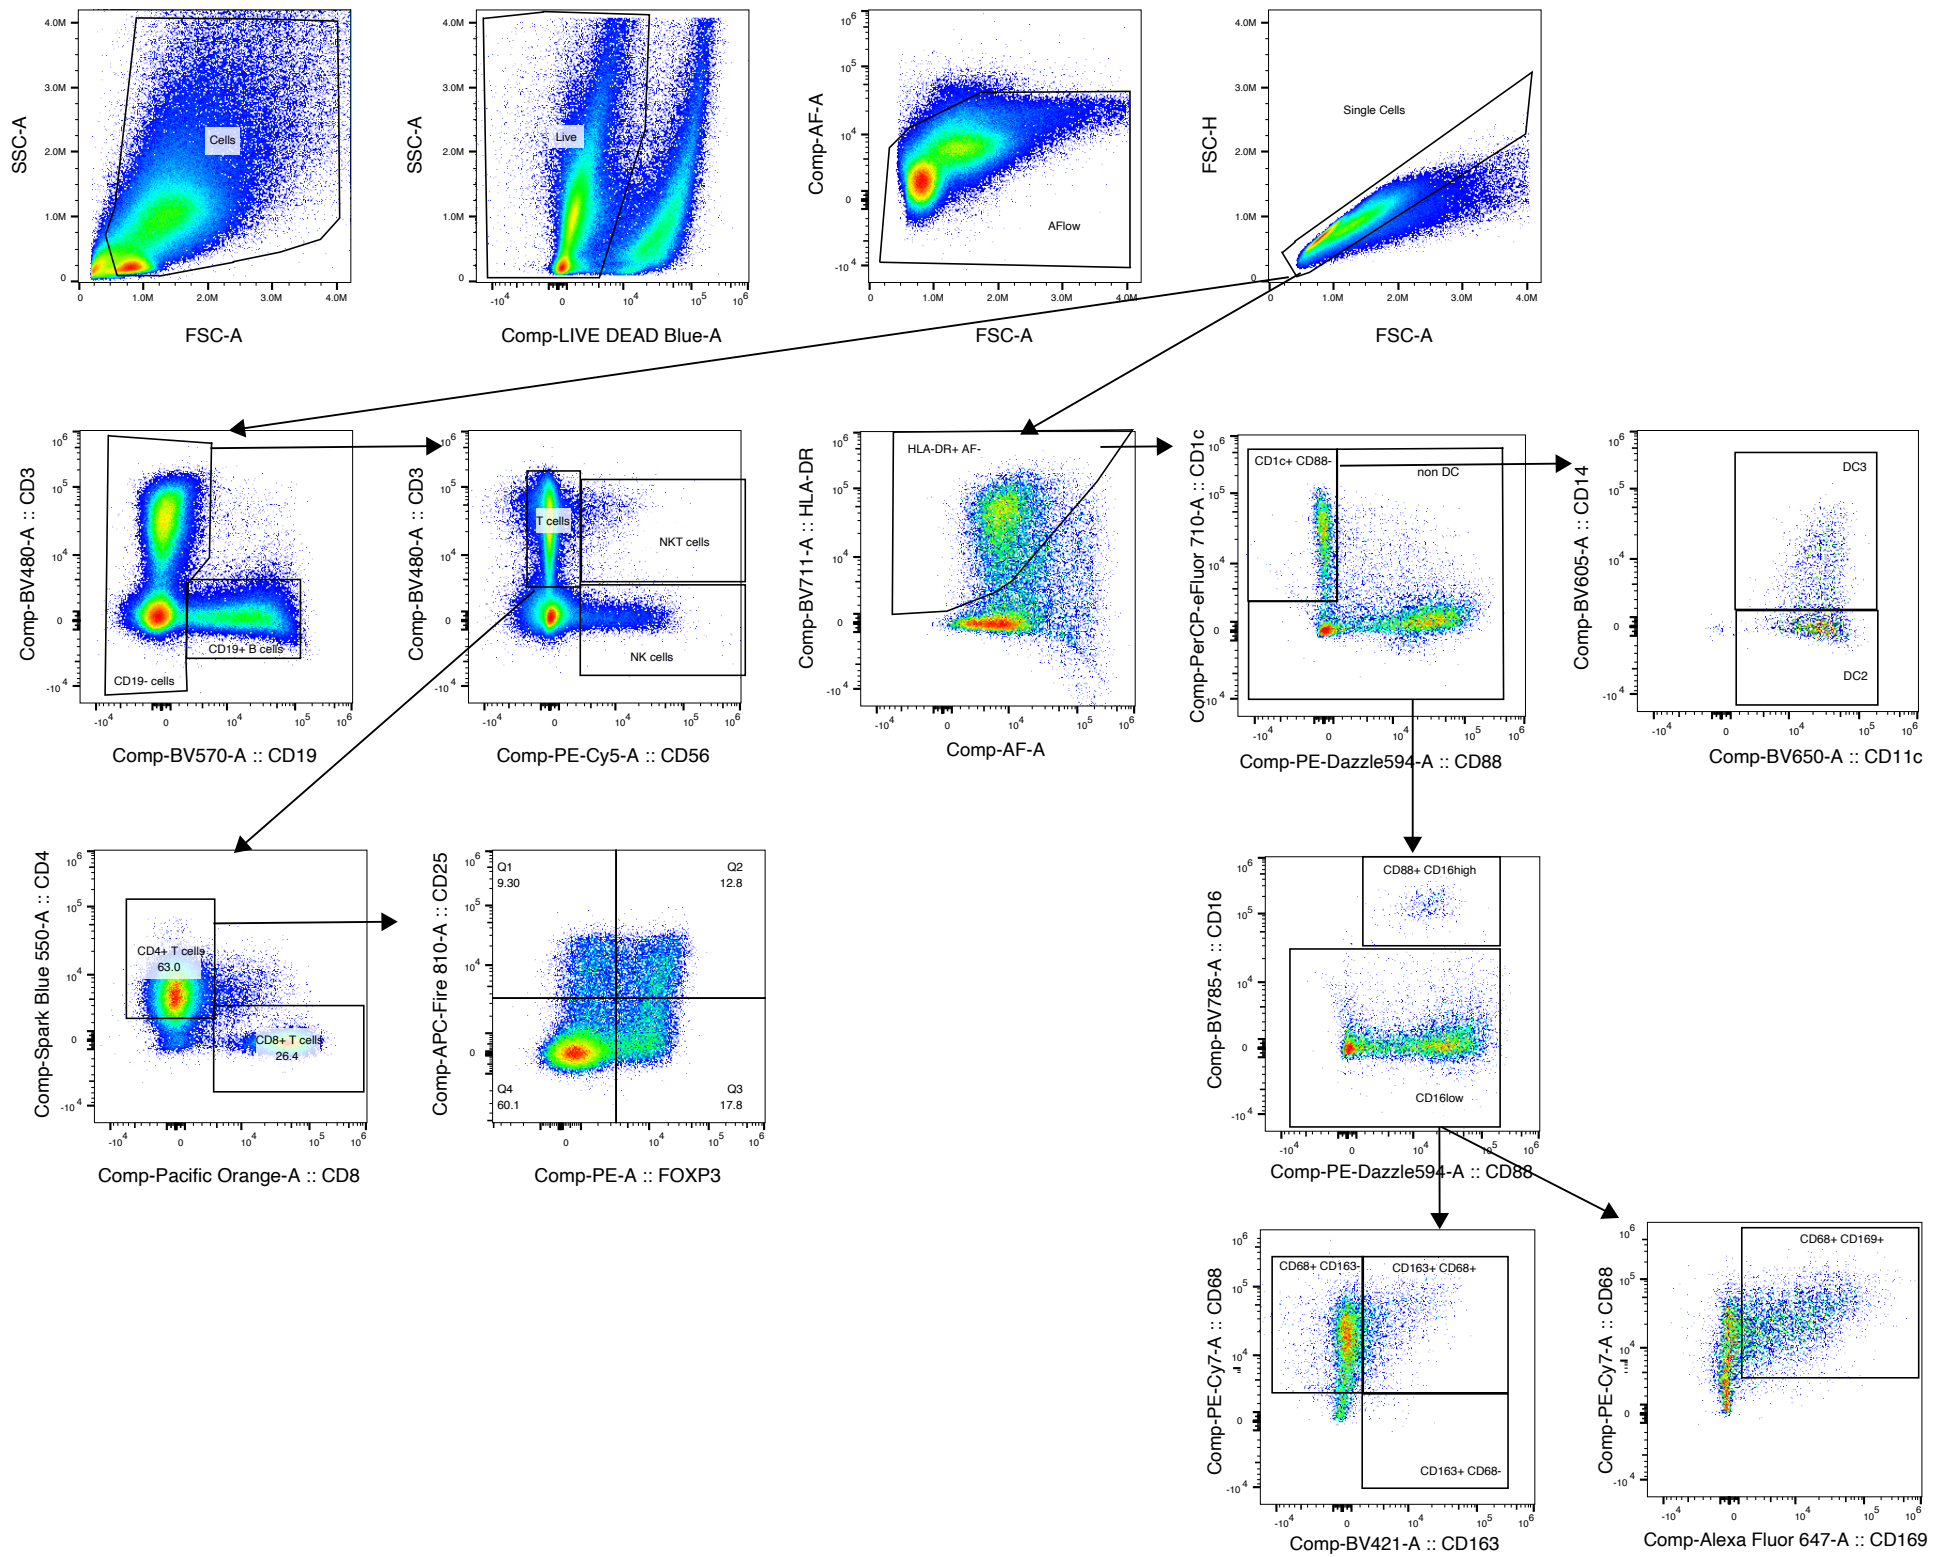

Supplement: MOESM1 [file 26278702]
